# Supplementary material for: Dysregulated Iron Metabolism-Associated Dietary Pattern Predicts an Altered Body Composition and Metabolic Syndrome
Source: MDPI journal article supplement (doi:10.3390/nu11112733), 2019-11-11
Supplement: s1 [file s1]

## Supplementary

**Table 1:** Strengthening the Reporting of Observational Studies in Epidemiology (STROBE) Statement—Checklist of items that should be included in reports of cross-sectional studies.

|                              | Item<br>No | Recommendation                                                                                                                                                                                                                     |
|------------------------------|------------|------------------------------------------------------------------------------------------------------------------------------------------------------------------------------------------------------------------------------------|
| Title and abstract           | 1          | (a) Indicate the study's design with a commonly used term in the title or the abstract<br>Page 1: Line 1– 4, Line 25-40                                                                                                            |
|                              |            | (b) Provide in the abstract an informative and balanced summary of what was done and what was found<br>What was done: Page 1: Line 26-30. What was found: Page 1, Line 30-38.                                                      |
| Background/rationale         | 2          | Explain the scientific background and rationale for the investigation being reported<br>Page 1: Abstract: Line 25-26; Introduction: page 2: line 82-84                                                                             |
| Objectives                   | 3          | State specific objectives, including any prespecified hypotheses<br>Page 2: Line 84-88                                                                                                                                             |
| Study design                 | 4          | Present key elements of study design early in the paper<br>Page 2-3: Line 90-106                                                                                                                                                   |
| Setting                      | 5          | Describe the setting, locations, and relevant dates, including periods of recruitment, exposure, follow-up, and data collection<br>Page 2: Line 94-97                                                                              |
| Participants                 | 6          | (a) Give the eligibility criteria, and the sources and methods of selection of participants<br>Page 2: Line 94-97                                                                                                                  |
| Variables                    | 7          | Clearly define all outcomes, exposures, predictors, potential confounders, and effect modifiers. Give diagnostic criteria, if applicable<br>Page 3: Line 119-143                                                                   |
| Data sources/<br>measurement | 8*         | For each variable of interest, give sources of data and details of methods of assessment (measurement). Describe comparability of assessment methods if there is more than one group<br>Page 3: Line 108-129, Page 4: Line 148-165 |
| Bias                         | 9          | Describe any efforts to address potential sources of bias<br>Page 2-3: Line 99-106                                                                                                                                                 |
| Study size                   | 10         | Explain how the study size was arrived at<br>Page 2: Line 97-99                                                                                                                                                                    |
| Quantitative variables       | 11         | Explain how quantitative variables were handled in the analyses. If applicable, describe which groupings were chosen and why<br>Page 4: Line 166-183                                                                               |
| Statistical methods          | 12         | (a) Describe all statistical methods, including those used to control for confounding<br>Page 4: Line 166-183                                                                                                                      |

|                  |     |                                                                                                                                                                                                                                                                   |
|------------------|-----|-------------------------------------------------------------------------------------------------------------------------------------------------------------------------------------------------------------------------------------------------------------------|
|                  |     | (b) Describe any methods used to examine subgroups and interactions<br>Page 4: Line 169-172                                                                                                                                                                       |
|                  |     | (c) Explain how missing data were addressed<br>Page 3: Line 104-105                                                                                                                                                                                               |
|                  |     | (d) If applicable, describe analytical methods taking account of sampling strategy<br>Page 2-3: Line 94-106                                                                                                                                                       |
|                  |     | (e) Describe any sensitivity analyses<br>Not applicable                                                                                                                                                                                                           |
| Participants     | 13* | (a) Report numbers of individuals at each stage of study—eg numbers potentially eligible, examined for eligibility, confirmed eligible, included in the study, completing follow-up, and analysed<br>Page 2-3: Line 94-105                                        |
|                  |     | (b) Give reasons for non-participation at each stage<br>Page 2-3: Line 94-105                                                                                                                                                                                     |
|                  |     | (c) Consider use of a flow diagram<br>Not applicable as patients were mainly recruited in the Division of Gastroenterology and Hepatobiliary Disease, Department of Internal Medicine, Taipei Medical University Hospital (Taipei, Taiwan).<br>Page 2: Line 94-97 |
| Descriptive data | 14* | (a) Give characteristics of study participants (eg demographic, clinical, social) and information on exposures and potential confounders<br>Page 5: Line 190-201                                                                                                  |
|                  |     | (b) Indicate number of participants with missing data for each variable of interest<br>Page 2-3: Line 94-105                                                                                                                                                      |
| Outcome data     | 15* | Report numbers of outcome events or summary measures<br>Page 6-10: Line 233 – 317.                                                                                                                                                                                |
| Main results     | 16  | (a) Give unadjusted estimates and, if applicable, confounder-adjusted estimates and their precision (eg, 95% confidence interval). Make clear which confounders were adjusted for and why they were included<br>Page 7 – 8: Line 211-292                          |
|                  |     | (b) Report category boundaries when continuous variables were categorized<br>Page 8-9: Line 265-275                                                                                                                                                               |
|                  |     | (c) If relevant, consider translating estimates of relative risk into absolute risk for a meaningful time period<br>Page 6: lines 217-222, page 10: line 280-292                                                                                                  |
| Other analyses   | 17  | Report other analyses done—eg analyses of subgroups and interactions, and sensitivity analyses<br>Not applicable.                                                                                                                                                 |
| Key results      | 18  | Summarise key results with reference to study objectives<br>Page 1: Line 30-38, Page 10: Line 294-304                                                                                                                                                             |

|                  |    |                                                                                                                                                                                                                                                                |
|------------------|----|----------------------------------------------------------------------------------------------------------------------------------------------------------------------------------------------------------------------------------------------------------------|
| Limitations      | 19 | <p>Discuss limitations of the study, taking into account sources of potential bias or imprecision. Discuss both direction and magnitude of any potential bias</p> <p>Page 12: Line 377-389</p>                                                                 |
| Interpretation   | 20 | <p>Give a cautious overall interpretation of results considering objectives, limitations, multiplicity of analyses, results from similar studies, and other relevant evidence</p> <p>Page 1: Line 315-325, Page 11-12: Line 340-362, Page 13: Line 363-375</p> |
| Generalisability | 21 | <p>Discuss the generalisability (external validity) of the study results</p> <p>Page 11: Line 340-362</p>                                                                                                                                                      |
| Funding          | 22 | <p>Give the source of funding and the role of the funders for the present study and, if applicable, for the original study on which the present article is based</p> <p>Page 12: Line 400-402</p>                                                              |
